# Supplementary material for: Exploring Host-Specificity: Untangling the relationship between Leishmania (Viannia) species and its endosymbiont Leishmania RNA Virus 1
Source: Preprints.org preprint supplement (doi:10.20944/preprints202308.0703.v1), 2023-08-09
Supplement: Supplementary file 1 [file supplementary:Table%20S1.docx.pdf]

Table S1. Information on LRV1 sequences from previous studies used for phylogenetic analyses

| CLIOC<br><i>Leishmania</i><br>Strain ID<br>(IOCL) | GenBank<br>Accession<br>Number | International<br>Code     | Parasite<br>Species    | Geographic<br>Origin                      | Reference                       |
|---------------------------------------------------|--------------------------------|---------------------------|------------------------|-------------------------------------------|---------------------------------|
| 3562                                              | MG202146                       | MHOM/BR/2014<br>/308      | <i>L. braziliensis</i> | Porto<br>Velho/Rondônia/<br>Brazil        | Cantanhêde et<br>al., 2018 [18] |
| NA                                                | MG202144                       | MHOM/BR/2015<br>/386      | <i>L. braziliensis</i> | Porto<br>Velho/Rondônia/<br>Brazil        | Cantanhêde et<br>al., 2018 [18] |
| 3545                                              | MG202143                       | MHOM/BR/2014<br>/275      | <i>L. braziliensis</i> | Porto<br>Velho/Rondônia/<br>Brazil        | Cantanhêde et<br>al., 2018 [18] |
| 3569                                              | MG202145                       | MHOM/BR/2014<br>/299      | <i>L. braziliensis</i> | Porto<br>Velho/Rondônia/<br>Brazil        | Cantanhêde et<br>al., 2018 [18] |
| 3567                                              | MG202139                       | MHOM/BR/2014<br>/291      | <i>L. braziliensis</i> | Porto<br>Velho/Rondônia/<br>Brazil        | Cantanhêde et<br>al., 2018 [18] |
| 3538                                              | MG202140                       | MHOM/BR/2014<br>/271      | <i>L. guyanensis</i>   | Candeias do<br>Jamari/Rondônia/<br>Brazil | Cantanhêde et<br>al., 2018 [18] |
| 3354                                              | MG202141                       | MHOM/BR/2011<br>/S77-ABF  | <i>L. guyanensis</i>   | Santarem/Pará/<br>Brazil                  | Cantanhêde et<br>al., 2018 [18] |
| 1545                                              | MG202142                       | MCEB/BR/1984/<br>M8408    | <i>L. shawi</i>        | Paraupébas/Pará/<br>Brazil                | Cantanhêde et<br>al., 2018 [18] |
| 3460                                              | MG202147                       | MHOM/BR/2013<br>/04LTAVMR | <i>L. guyanensis</i>   | Manaus/Amazonas/<br>Brazil                | Cantanhêde et<br>al., 2018 [18] |
| 3461                                              | MG202148                       | MHOM/BR/2013<br>/05LTAMVL | <i>L. guyanensis</i>   | Manaus/Amazonas/<br>Brazil                | Cantanhêde et<br>al., 2018 [18] |
| 3486                                              | MG202149                       | MHOM/BR/2013<br>/27JNS    | <i>L. guyanensis</i>   | Manaus/Amazonas/<br>Brazil                | Cantanhêde et<br>al., 2018 [18] |
| 3542                                              | MG202151                       | MHOM/BR/2014<br>/ 233CFS  | <i>L. guyanensis</i>   | Manaus/Amazonas/<br>Brazil                | Cantanhêde et<br>al., 2018 [18] |
| 3503                                              | MG202150                       | MHOM/BR/2013<br>/33LGS    | <i>L. guyanensis</i>   | Manaus/Amazonas/<br>Brazil                | Cantanhêde et<br>al., 2018 [18] |
| 1398                                              | JX313127                       | MHOM/BR/1989<br>/IM3597   | <i>L. guyanensis</i>   | Manaus/Amazonas/<br>Brazil                | Cantanhêde et<br>al., 2018 [18] |
| NA                                                | KY750607                       | MHOM/FG/2011<br>/2001     | <i>L. guyanensis</i>   | Manaus/Amazonas/<br>Brazil                | Tirera et al.,<br>2017 [17]     |
| 565                                               | KX808487                       | MHOM/BR/1975<br>/M4147    | <i>L. guyanensis</i>   | Monte<br>Dourado/Pará/<br>Brazil          | Brettmann et<br>al., 2016 [32]  |
| 565                                               | U01899                         | MHOM/BR/1975<br>/M4147    | <i>L. guyanensis</i>   | Monte<br>Dourado/Pará/<br>Brazil          | Tirera et al.,<br>2017 [17]     |

|    |          |                        |                        |                                  |                                |
|----|----------|------------------------|------------------------|----------------------------------|--------------------------------|
| NA | JX313126 | IWHI/BR/1978/<br>M5313 | <i>L. guyanensis</i>   | Monte<br>Dourado/Pará/<br>Brazil | Tirera et al.,<br>2017 [17]    |
| NA | KY750608 | MHOM/FG/2013<br>/LF94  | <i>L. guyanensis</i>   | French Guiana                    | Tirera et al.,<br>2017 [17]    |
| NA | KY750609 | MHOM/FG/2013<br>XJ93   | <i>L. guyanensis</i>   | French Guiana                    | Tirera et al.,<br>2017 [17]    |
| NA | KY750610 | MHOM/FG/2013<br>YA70   | <i>L. braziliensis</i> | French Guiana                    | Tirera et al.,<br>2017 [17]    |
| NA | KY750611 | MHOM/FG/2013<br>/2014  | <i>L. guyanensis</i>   | French Guiana                    | Tirera et al.,<br>2017 [17]    |
| NA | KY750612 | MHOM/FG/2012<br>/2008  | <i>L. guyanensis</i>   | French Guiana                    | Tirera et al.,<br>2017 [17]    |
| NA | KY750613 | MHOM/FG/2012<br>/2015  | <i>L. guyanensis</i>   | French Guiana                    | Tirera et al.,<br>2017 [17]    |
| NA | KY750614 | MHOM/FG/2012<br>/2028  | <i>L. guyanensis</i>   | French Guiana                    | Tirera et al.,<br>2017 [17]    |
| NA | KY750615 | MHOM/FG/2012<br>/2028  | <i>L. guyanensis</i>   | French Guiana                    | Tirera et al.,<br>2017 [17]    |
| NA | KY750616 | MHOM/FG/2012<br>/2028  | <i>L. guyanensis</i>   | French Guiana                    | Tirera et al.,<br>2017 [17]    |
| NA | KY750617 | MHOM/FG/2013<br>/LF98  | <i>L. guyanensis</i>   | French Guiana                    | Tirera et al.,<br>2017 [17]    |
| NA | KY750618 | MHOM/FG/2012<br>/LL28  | <i>L. guyanensis</i>   | French Guiana                    | Tirera et al.,<br>2017 [17]    |
| NA | KY750619 | MHOM/FG/2012<br>/MC71  | <i>L. guyanensis</i>   | French Guiana                    | Tirera et al.,<br>2017 [17]    |
| NA | KY750620 | MHOM/FG/2012<br>/MJ25  | <i>L. guyanensis</i>   | French Guiana                    | Tirera et al.,<br>2017 [17]    |
| NA | KY750621 | MHOM/FG/2014<br>/PD46  | <i>L. guyanensis</i>   | French Guiana                    | Tirera et al.,<br>2017 [17]    |
| NA | KY750622 | MHOM/FG/2012<br>/VL19  | <i>L. guyanensis</i>   | French Guiana                    | Tirera et al.,<br>2017 [17]    |
| NA | KY750623 | MHOM/FG/2013<br>/VW21  | <i>L. guyanensis</i>   | French Guiana                    | Tirera et al.,<br>2017 [17]    |
| NA | KY750624 | MHOM/FG/2012<br>/WF69  | <i>L. guyanensis</i>   | French Guiana                    | Tirera et al.,<br>2017 [17]    |
| NA | KY750625 | MHOM/FG/2012<br>/WF69  | <i>L. guyanensis</i>   | French Guiana                    | Tirera et al.,<br>2017 [17]    |
| NA | KY750626 | MHOM/FG/2013/<br>XJ93  | <i>L. guyanensis</i>   | French Guiana                    | Tirera et al.,<br>2017 [17]    |
| NA | KY750627 | MHOM/FG/2013<br>/XK73  | <i>L. guyanensis</i>   | French Guiana                    | Tirera et al.,<br>2017 [17]    |
| NA | KY750628 | MHOM/FG/2013<br>/YE48  | <i>L. guyanensis</i>   | French Guiana                    | Tirera et al.,<br>2017 [17]    |
| NA | KY750629 | MHOM/FG/2014<br>/YR07  | <i>L. guyanensis</i>   | French Guiana                    | Tirera et al.,<br>2017 [17]    |
| NA | KY750630 | MHOM/FG/2012<br>/YZ58  | <i>L. guyanensis</i>   | French Guiana                    | Tirera et al.,<br>2017 [17]    |
| NA | KX808483 | MHOM/BO/1990<br>/AN    | <i>L. braziliensis</i> | Bolivia                          | Brettmann et<br>al., 2016 [32] |

|    |          |                        |                        |          |                                 |
|----|----------|------------------------|------------------------|----------|---------------------------------|
| NA | KX808486 | MHOM/BO/IMT<br>252     | <i>L. braziliensis</i> | Bolivia  | Brettmann et<br>al., 2016 [32]  |
| NA | KX808485 | MHOM/BO/1990<br>/CS    | <i>L. braziliensis</i> | Bolivia  | Brettmann et<br>al., 2016 [32]  |
| NA | KX808484 | MHOM/BO/1990<br>/CS    | <i>L. braziliensis</i> | Bolivia  | Brettmann et<br>al., 2016 [32]  |
| NA | KC862308 | MHOM/BO/2011<br>/2169  | <i>L. braziliensis</i> | Bolivia  | Parmentier et<br>al., 2016 [33] |
| NA | M92355   | MHOM/SR/1980/<br>CUMC1 | <i>L. guyanensis</i>   | Suriname | Parmentier et<br>al., 2016 [33] |

NA: Non applicated
